# Supplementary material for: A Proteolytic Complex Targets Multiple Cell Wall Hydrolases in Pseudomonas aeruginosa
Source: PubMed Central journal article supplement (PMC6050968; doi:10.1128/mbio.00972-18), 2018-07-17
Supplement: mbo003183912sf1.pdf [file mbo003183912sf1.pdf]

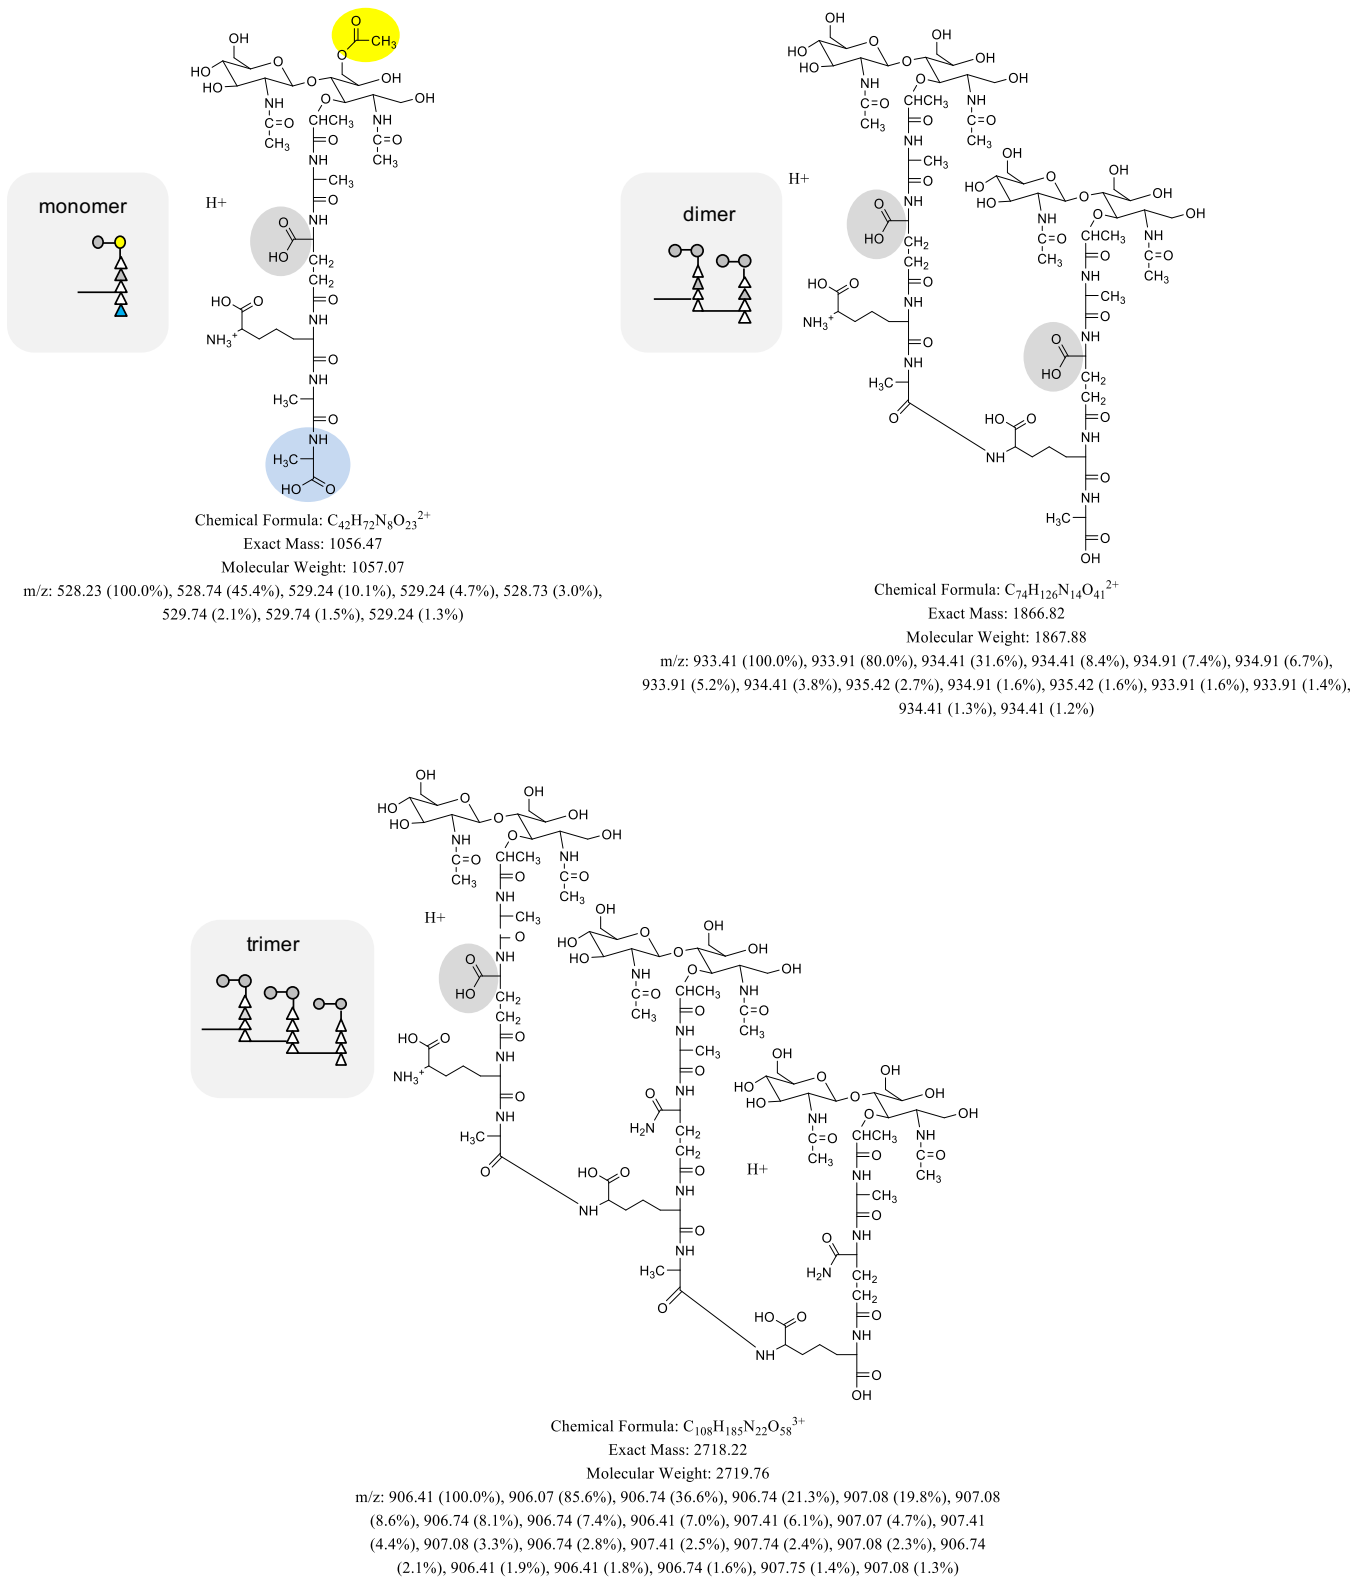

**Supplementary Figure S1.** Chemical structure of peptidoglycan monomer, dimer, and trimer corresponding to the mass spectra shown in Figure 6.
