# Supplementary material for: A Proteolytic Complex Targets Multiple Cell Wall Hydrolases in Pseudomonas aeruginosa
Source: PubMed Central journal article supplement (PMC6050968; doi:10.1128/mbio.00972-18), 2018-07-17
Supplement: mbo003183912st1.pdf [file mbo003183912st1.pdf]

Supplemental Table 1: Proteins that co-purified in each of two LbcA-CtpA-S302A pulldowns, but were absent in each of two LbcA-CtpA pulldowns

| Accession | Description                                                                                                                                                                                  | Coverage Expt. 1 | # PSM Expt. 1 | Coverage Expt. 2 | # PSM Expt. 2 | Average Coverage | Average #PSM | Gene        | Confirmed CtpA substrate? |
|-----------|----------------------------------------------------------------------------------------------------------------------------------------------------------------------------------------------|------------------|---------------|------------------|---------------|------------------|--------------|-------------|---------------------------|
| Q915Q4    | Uncharacterized protein OS=Pseudomonas aeruginosa (strain ATCC 15692 / PAO1 / 1C / PRS 101 / LMG 12228) GN=PA0667 PE=4 SV=1 - [Q915Q4_PSEAE]                                                 | 64.21            | 87            | 59.28            | 76            | 61.745           | 81.5         | PA0667/mepM | YES                       |
| Q914E0    | Uncharacterized protein OS=Pseudomonas aeruginosa (strain ATCC 15692 / PAO1 / 1C / PRS 101 / LMG 12228) GN=PA1198 PE=4 SV=1 - [Q914E0_PSEAE]                                                 | 76.59            | 68            | 75.12            | 56            | 75.855           | 62           | PA1198      | YES                       |
| Q912T2    | Membrane-bound lytic murein transglycosylase D OS=Pseudomonas aeruginosa (strain ATCC 15692 / PAO1 / 1C / PRS 101 / LMG 12228) GN=mitB PE=4 SV=1 - [Q912T2_PSEAE]                            | 43.45            | 29            | 45.51            | 27            | 44.48            | 28           | PA1812/mitD |                           |
| Q9X6V6    | RlpA-like lipoprotein OS=Pseudomonas aeruginosa (strain ATCC 15692 / PAO1 / 1C / PRS 101 / LMG 12228) GN=rlpA PE=3 SV=1 - [RLPA_PSEAE]                                                       | 71.05            | 24            | 54.39            | 23            | 62.72            | 23.5         | PA4000/RlpA |                           |
| O87128    | Chromosome/plasmid partitioning protein ParA OS=Pseudomonas aeruginosa GN=orf3 PE=4 SV=1 - [O87128_PSEAE]                                                                                    | 40.46            | 19            | 37.02            | 19            | 38.74            | 19           | PA1462      |                           |
| Q9I0M6    | Serine-tRNA ligase OS=Pseudomonas aeruginosa (strain ATCC 15692 / PAO1 / 1C / PRS 101 / LMG 12228) GN=serS PE=3 SV=1 - [SYS_PSEAE]                                                           | 42.96            | 16            | 40.85            | 19            | 41.905           | 17.5         | serS        |                           |
| Q9HV17    | 50S ribosomal protein L27 OS=Pseudomonas aeruginosa (strain ATCC 15692 / PAO1 / 1C / PRS 101 / LMG 12228) GN=rpmA PE=1 SV=3 - [RL27_PSEAE]                                                   | 68.24            | 14            | 63.83            | 16            | 65.885           | 15           | rpmA        |                           |
| Q9HXP9    | 30S ribosomal protein S16 OS=Pseudomonas aeruginosa (strain ATCC 15692 / PAO1 / 1C / PRS 101 / LMG 12228) GN=rpsP PE=3 SV=1 - [RS16_PSEAE]                                                   | 63.86            | 9             | 59.04            | 12            | 61.45            | 10.5         | rpsP        |                           |
| Q9HVF9    | Uncharacterized protein OS=Pseudomonas aeruginosa (strain ATCC 15692 / PAO1 / 1C / PRS 101 / LMG 12228) GN=PA4632 PE=3 SV=1 - [Q9HVF9_PSEAE]                                                 | 26.37            | 6             | 44.69            | 12            | 35.53            | 9            | PA4632      |                           |
| Q9I6C0    | Cell division protein FtsE OS=Pseudomonas aeruginosa (strain ATCC 15692 / PAO1 / 1C / PRS 101 / LMG 12228) GN=ftsE PE=4 SV=1 - [Q9I6C0_PSEAE]                                                | 61.43            | 10            | 56.50            | 11            | 58.965           | 10.5         | ftsE        |                           |
| Q9HUH3    | Uncharacterized protein OS=Pseudomonas aeruginosa (strain ATCC 15692 / PAO1 / 1C / PRS 101 / LMG 12228) GN=PA4992 PE=1 SV=1 - [Q9HUH3_PSEAE]                                                 | 44.81            | 10            | 47.78            | 10            | 46.295           | 10           | PA4992      |                           |
| Q9HX31    | DNA polymerase III, delta subunit OS=Pseudomonas aeruginosa (strain ATCC 15692 / PAO1 / 1C / PRS 101 / LMG 12228) GN=hoA PE=4 SV=1 - [Q9HX31_PSEAE]                                          | 24.06            | 8             | 38.84            | 10            | 31.45            | 9            | hoA         |                           |
| Q9HWD4    | 30S ribosomal protein S10 OS=Pseudomonas aeruginosa (strain ATCC 15692 / PAO1 / 1C / PRS 101 / LMG 12228) GN=rpsJ PE=3 SV=1 - [RS10_PSEAE]                                                   | 53.40            | 7             | 59.22            | 10            | 56.31            | 8.5          | rpsJ        |                           |
| Q9I0T2    | Probable acyl-CoA dehydrogenase OS=Pseudomonas aeruginosa (strain ATCC 15692 / PAO1 / 1C / PRS 101 / LMG 12228) GN=PA2552 PE=3 SV=1 - [Q9I0T2_PSEAE]                                         | 22.93            | 5             | 42.93            | 10            | 32.93            | 7.5          | PA2552      |                           |
| Q9HVX3    | Soluble and membrane-bound lytic transglycosylase OS=Pseudomonas aeruginosa (strain ATCC 15692 / PAO1 / 1C / PRS 101 / LMG 12228) GN=mitB1 PE=4 SV=1 - [Q9HVX3_PSEAE]                        | 23.98            | 7             | 30.25            | 9             | 27.115           | 8            | mitB1       |                           |
| Q9I5H1    | Uncharacterized protein OS=Pseudomonas aeruginosa (strain ATCC 15692 / PAO1 / 1C / PRS 101 / LMG 12228) GN=PA0758 PE=4 SV=1 - [Q9I5H1_PSEAE]                                                 | 29.86            | 6             | 44.96            | 9             | 37.41            | 7.5          | PA0758      |                           |
| Q9I7B8    | Glycine-tRNA ligase beta subunit OS=Pseudomonas aeruginosa (strain ATCC 15692 / PAO1 / 1C / PRS 101 / LMG 12228) GN=glyS PE=3 SV=1 - [SYGB_PSEAE]                                            | 17.69            | 9             | 15.94            | 8             | 16.815           | 8.5          | glyS        |                           |
| Q9HW86    | MvaT OS=Pseudomonas aeruginosa (strain ATCC 15692 / PAO1 / 1C / PRS 101 / LMG 12228) GN=mvaT PE=1 SV=1 - [Q9HW86_PSEAE]                                                                      | 47.58            | 7             | 40.32            | 8             | 43.95            | 7.5          | mvaT        |                           |
| Q9HWD6    | 50S ribosomal protein L4 OS=Pseudomonas aeruginosa (strain ATCC 15692 / PAO1 / 1C / PRS 101 / LMG 12228) GN=rplD PE=3 SV=1 - [RL4_PSEAE]                                                     | 37.50            | 6             | 54.00            | 8             | 45.75            | 7            | rplD        |                           |
| Q9HWE2    | 50S ribosomal protein L16 OS=Pseudomonas aeruginosa (strain ATCC 15692 / PAO1 / 1C / PRS 101 / LMG 12228) GN=rplP PE=3 SV=1 - [RL16_PSEAE]                                                   | 34.31            | 4             | 41.61            | 8             | 37.96            | 6            | rplP        |                           |
| Q9HWF1    | 50S ribosomal protein L18 OS=Pseudomonas aeruginosa (strain ATCC 15692 / PAO1 / 1C / PRS 101 / LMG 12228) GN=rplR PE=3 SV=1 - [RL18_PSEAE]                                                   | 21.55            | 3             | 42.84            | 8             | 31.895           | 5.5          | rplR        |                           |
| Q9I456    | Probable outer membrane protein OS=Pseudomonas aeruginosa (strain ATCC 15692 / PAO1 / 1C / PRS 101 / LMG 12228) GN=PA1048 PE=4 SV=1 - [Q9I456_PSEAE]                                         | 39.25            | 10            | 32.42            | 7             | 35.835           | 8.5          | PA1048      |                           |
| Q9I503    | Uncharacterized protein OS=Pseudomonas aeruginosa (strain ATCC 15692 / PAO1 / 1C / PRS 101 / LMG 12228) GN=PA0955 PE=4 SV=1 - [Q9I503_PSEAE]                                                 | 36.79            | 9             | 32.39            | 7             | 34.59            | 8            | PA0955      |                           |
| Q9I3B3    | Probable chemotaxis transducer OS=Pseudomonas aeruginosa (strain ATCC 15692 / PAO1 / 1C / PRS 101 / LMG 12228) GN=PA1608 PE=4 SV=1 - [Q9I3B3_PSEAE]                                          | 25.14            | 8             | 21.44            | 7             | 23.29            | 7.5          | PA1608      |                           |
| Q9HW15    | Probable short-chain dehydrogenase OS=Pseudomonas aeruginosa (strain ATCC 15692 / PAO1 / 1C / PRS 101 / LMG 12228) GN=speA PE=3 SV=1 - [Q9HW15_PSEAE]                                        | 26.98            | 5             | 41.27            | 7             | 34.125           | 6            | speA        |                           |
| Q9I5R6    | 2-noprenyl-3-methyl-6-methoxy-1,4-benzoquinol hydroxylase OS=Pseudomonas aeruginosa (strain ATCC 15692 / PAO1 / 1C / PRS 101 / LMG 12228) GN=coq7 PE=1 SV=1 - [COQ7_PSEAE]                   | 51.16            | 6             | 41.86            | 6             | 46.51            | 6            | PA0655      |                           |
| P72176    | PchC protein OS=Pseudomonas aeruginosa GN=pchC PE=4 SV=1 - [P72176_PSEAE]                                                                                                                    | 20.80            | 4             | 17.60            | 6             | 19.2             | 5            | pchC        |                           |
| Q9HUW8    | Uncharacterized protein OS=Pseudomonas aeruginosa (strain ATCC 15692 / PAO1 / 1C / PRS 101 / LMG 12228) GN=PA4842 PE=4 SV=1 - [Q9HUW8_PSEAE]                                                 | 16.29            | 5             | 16.01            | 5             | 16.15            | 5            | PA4842      |                           |
| Q9HV88    | Probable chemotaxis transducer OS=Pseudomonas aeruginosa (strain ATCC 15692 / PAO1 / 1C / PRS 101 / LMG 12228) GN=PA4633 PE=4 SV=1 - [Q9HV88_PSEAE]                                          | 9.27             | 5             | 11.52            | 5             | 10.395           | 5            | PA4633      |                           |
| P72158    | N5-carboxyaminoimidazole ribonucleotide synthase OS=Pseudomonas aeruginosa (strain ATCC 15692 / PAO1 / 1C / PRS 101 / LMG 12228) GN=purK PE=3 SV=2 - [PURK_PSEAE]                            | 15.00            | 4             | 18.33            | 5             | 16.665           | 4.5          | purK        |                           |
| P14532    | Cytochrome c51 peroxidase OS=Pseudomonas aeruginosa (strain ATCC 15692 / PAO1 / 1C / PRS 101 / LMG 12228) GN=ccpA PE=1 SV=2 - [CCPR_PSEAE]                                                   | 9.54             | 4             | 15.32            | 5             | 12.43            | 4.5          | ccpR        |                           |
| P30819    | Nicotinate-nucleotide pyrophosphorylase [carboxylating] OS=Pseudomonas aeruginosa (strain ATCC 15692 / PAO1 / 1C / PRS 101 / LMG 12228) GN=nadC PE=3 SV=2 - [NADC_PSEAE]                     | 13.12            | 3             | 19.15            | 5             | 16.135           | 4            | nadC        |                           |
| Q9HX11    | Methionine aminopeptidase OS=Pseudomonas aeruginosa (strain ATCC 15692 / PAO1 / 1C / PRS 101 / LMG 12228) GN=map PE=1 SV=1 - [Q9HX11_PSEAE]                                                  | 12.26            | 2             | 28.35            | 5             | 20.305           | 3.5          | map         |                           |
| Q9I405    | Amino acid ABC transporter ATP binding protein OS=Pseudomonas aeruginosa (strain ATCC 15692 / PAO1 / 1C / PRS 101 / LMG 12228) GN=PA1339 PE=3 SV=1 - [Q9I405_PSEAE]                          | 12.70            | 2             | 25.82            | 5             | 19.26            | 3.5          | PA1339      |                           |
| Q9I5Y1    | Fructose-bisphosphate aldolase OS=Pseudomonas aeruginosa (strain ATCC 15692 / PAO1 / 1C / PRS 101 / LMG 12228) GN=fta PE=3 SV=1 - [ALF_PSEAE]                                                | 9.60             | 2             | 24.01            | 5             | 16.805           | 3.5          | fta         |                           |
| Q9HW68    | Probable fumarate OS=Pseudomonas aeruginosa (strain ATCC 15692 / PAO1 / 1C / PRS 101 / LMG 12228) GN=PA4333 PE=4 SV=1 - [Q9HW68_PSEAE]                                                       | 5.13             | 2             | 16.57            | 5             | 10.85            | 3.5          | PA4333      |                           |
| Q9I0I6    | Methyl-accepting chemotaxis protein PA2652 OS=Pseudomonas aeruginosa (strain ATCC 15692 / PAO1 / 1C / PRS 101 / LMG 12228) GN=PA2652 PE=3 SV=1 - [MALCR_PSEAE]                               | 2.85             | 2             | 15.33            | 5             | 9.09             | 3.5          | PA2652      |                           |
| Q9HYU8    | Probable HIT family protein OS=Pseudomonas aeruginosa (strain ATCC 15692 / PAO1 / 1C / PRS 101 / LMG 12228) GN=PA3295 PE=4 SV=1 - [Q9HYU8_PSEAE]                                             | 41.38            | 6             | 17.24            | 4             | 29.31            | 5            | PA3295      |                           |
| Q9HVM1    | 30S ribosomal protein S20 OS=Pseudomonas aeruginosa (strain ATCC 15692 / PAO1 / 1C / PRS 101 / LMG 12228) GN=rpsT PE=1 SV=3 - [RS20_PSEAE]                                                   | 34.07            | 5             | 34.07            | 4             | 34.07            | 5            | rpsT        |                           |
| Q9I253    | Uncharacterized protein OS=Pseudomonas aeruginosa (strain ATCC 15692 / PAO1 / 1C / PRS 101 / LMG 12228) GN=fimL PE=4 SV=1 - [Q9I253_PSEAE]                                                   | 17.08            | 6             | 11.21            | 4             | 14.145           | 5            | fimL        |                           |
| Q9HVX4    | Uncharacterized protein OS=Pseudomonas aeruginosa (strain ATCC 15692 / PAO1 / 1C / PRS 101 / LMG 12228) GN=PA4444 PE=4 SV=1 - [Q9HVX4_PSEAE]                                                 | 37.84            | 5             | 34.46            | 4             | 36.15            | 4.5          | PA4444      |                           |
| Q9I787    | Uncharacterized protein OS=Pseudomonas aeruginosa (strain ATCC 15692 / PAO1 / 1C / PRS 101 / LMG 12228) GN=PA0045 PE=4 SV=1 - [Q9I787_PSEAE]                                                 | 24.56            | 4             | 24.56            | 4             | 24.56            | 4            | PA0045      |                           |
| Q9HU24    | dTDP-glucose 4,6-dehydratase OS=Pseudomonas aeruginosa (strain ATCC 15692 / PAO1 / 1C / PRS 101 / LMG 12228) GN=rmlB PE=3 SV=1 - [Q9HU24_PSEAE]                                              | 18.47            | 4             | 19.42            | 4             | 18.895           | 4            | rmlB        |                           |
| Q9I215    | Probable transcriptional regulator OS=Pseudomonas aeruginosa (strain ATCC 15692 / PAO1 / 1C / PRS 101 / LMG 12228) GN=PA2100 PE=4 SV=1 - [Q9I215_PSEAE]                                      | 18.03            | 4             | 18.24            | 4             | 18.135           | 4            | PA2100      |                           |
| Q51434    | Protein phosphatase CheZ OS=Pseudomonas aeruginosa (strain ATCC 15692 / PAO1 / 1C / PRS 101 / LMG 12228) GN=cheZ PE=3 SV=2 - [CHEZ_PSEAE]                                                    | 17.18            | 4             | 17.18            | 4             | 17.18            | 4            | cheZ        |                           |
| Q9HW06    | Probable pyrophosphorylase OS=Pseudomonas aeruginosa (strain ATCC 15692 / PAO1 / 1C / PRS 101 / LMG 12228) GN=PA4400 PE=4 SV=1 - [Q9HW06_PSEAE]                                              | 13.65            | 3             | 27.62            | 4             | 20.635           | 3.5          | PA4400      |                           |
| P21629    | High-affinity branched-chain amino acid transport ATP-binding protein BraF OS=Pseudomonas aeruginosa (strain ATCC 15692 / PAO1 / 1C / PRS 101 / LMG 12228) GN=braF PE=3 SV=1 - [BRAFF_PSEAE] | 18.82            | 3             | 17.25            | 4             | 18.035           | 3.5          | braF        |                           |
| Q9HW04    | Arginine biosynthesis bifunctional protein ArgJ OS=Pseudomonas aeruginosa (strain ATCC 15692 / PAO1 / 1C / PRS 101 / LMG 12228) GN=argJ PE=3 SV=1 - [ARGJ_PSEAE]                             | 17.53            | 3             | 18.52            | 4             | 18.025           | 3.5          | argJ        |                           |
| Q9HZP7    | Electron transfer flavoprotein subunit alpha OS=Pseudomonas aeruginosa (strain ATCC 15692 / PAO1 / 1C / PRS 101 / LMG 12228) GN=etfA PE=3 SV=1 - [ETFA_PSEAE]                                | 15.86            | 3             | 20.39            | 4             | 18.125           | 3.5          | etfA        |                           |
| P07344    | Tryptophan synthase alpha chain OS=Pseudomonas aeruginosa (strain ATCC 15692 / PAO1 / 1C / PRS 101 / LMG 12228) GN=trpA PE=3 SV=3 - [TRPA_PSEAE]                                             | 13.43            | 3             | 18.28            | 4             | 15.855           | 3.5          | trpA        |                           |
| Q9I3F6    | Aerotaxis receptor Aer OS=Pseudomonas aeruginosa (strain ATCC 15692 / PAO1 / 1C / PRS 101 / LMG 12228) GN=aer PE=4 SV=1 - [Q9I3F6_PSEAE]                                                     | 8.25             | 3             | 11.71            | 4             | 9.98             | 3.5          | aer         |                           |
| O33407    | Esterase EstA OS=Pseudomonas aeruginosa (strain ATCC 15692 / PAO1 / 1C / PRS 101 / LMG 12228) GN=estA PE=1 SV=1 - [ESTA_PSEAE]                                                               | 6.66             | 3             | 10.22            | 4             | 8.44             | 3.5          | estA        |                           |
| Q9I452    | Probable 3-mercaptopyruvate sulfurtransferase OS=Pseudomonas aeruginosa (strain ATCC 15692 / PAO1 / 1C / PRS 101 / LMG 12228) GN=sseA PE=3 SV=1 - [THTM_PSEAE]                               | 15.49            | 2             | 33.10            | 4             | 24.295           | 3            | PA1292      |                           |
| Q9HU67    | Regulatory protein TyaP OS=Pseudomonas aeruginosa (strain ATCC 15692 / PAO1 / 1C / PRS 101 / LMG 12228) GN=tyaP PE=4 SV=1 - [Q9HU67_PSEAE]                                                   | 6.61             | 2             | 13.88            | 4             | 10.245           | 3            | tyaP        |                           |
| Q9I2F4    | Ribokinase OS=Pseudomonas aeruginosa (strain ATCC 15692 / PAO1 / 1C / PRS 101 / LMG 12228) GN=rbsK PE=3 SV=1 - [Q9I2F4_PSEAE]                                                                | 8.77             | 2             | 15.58            | 4             | 12.175           | 3            | rbsK        |                           |
| Q9HXP8    | Signal recognition particle protein OS=Pseudomonas aeruginosa (strain ATCC 15692 / PAO1 / 1C / PRS 101 / LMG 12228) GN=flh PE=3 SV=1 - [Q9HXP8_PSEAE]                                        | 2.84             | 2             | 8.53             | 4             | 5.685            | 3            | flh         |                           |
| Q9HU35    | Uncharacterized protein OS=Pseudomonas aeruginosa (strain ATCC 15692 / PAO1 / 1C / PRS 101 / LMG 12228) GN=PA5149 PE=4 SV=1 - [Q9HU35_PSEAE]                                                 | 31.94            | 8             | 11.39            | 3             | 21.665           | 5.5          | PA5149      |                           |
| Q9I530    | D-lactate dehydrogenase (Fermentative) OS=Pseudomonas aeruginosa (strain ATCC 15692 / PAO1 / 1C / PRS 101 / LMG 12228) GN=ldhA PE=3 SV=1 - [Q9I530_PSEAE]                                    | 31.00            | 7             | 19.15            | 3             | 25.075           | 5            | ldhA        |                           |
| P13982    | Carbamate kinase OS=Pseudomonas aeruginosa (strain ATCC 15692 / PAO1 / 1C / PRS 101 / LMG 12228) GN=arcC PE=3 SV=1 - [ARCC_PSEAE]                                                            | 17.10            | 6             | 9.68             | 3             | 13.39            | 4.5          | arcC        |                           |
| Q9HYD4    | Uncharacterized protein OS=Pseudomonas aeruginosa (strain ATCC 15692 / PAO1 / 1C / PRS 101 / LMG 12228) GN=PA3472 PE=4 SV=1 - [Q9HYD4_PSEAE]                                                 | 33.33            | 4             | 27.27            | 3             | 30.3             | 3.5          | PA3472      |                           |
| Q9I381    | Uncharacterized protein OS=Pseudomonas aeruginosa (strain ATCC 15692 / PAO1 / 1C / PRS 101 / LMG 12228) GN=PA1644 PE=4 SV=1 - [Q9I381_PSEAE]                                                 | 27.23            | 3             | 11.88            | 3             | 19.555           | 3            | PA1644      |                           |
| Q9I5E2    | 2-methylisocitrate lyase OS=Pseudomonas aeruginosa (strain ATCC 15692 / PAO1 / 1C / PRS 101 / LMG 12228) GN=prpB PE=3 SV=1 - [Q9I5E2_PSEAE]                                                  | 18.46            | 3             | 18.46            | 3             | 18.46            | 3            | prpB        |                           |
| Q9HXK8    | Uncharacterized protein OS=Pseudomonas aeruginosa (strain ATCC 15692 / PAO1 / 1C / PRS 101 / LMG 12228) GN=PA3787 PE=1 SV=1 - [Q9HXK8_PSEAE]                                                 | 19.09            | 3             | 17.73            | 3             | 17.91            | 3            | PA3787      |                           |
| O82852    | Uridylate kinase OS=Pseudomonas aeruginosa (strain ATCC 15692 / PAO1 / 1C / PRS 101 / LMG 12228) GN=pyrH PE=3 SV=2 - [PYRH_PSEAE]                                                            | 21.63            | 3             | 20.00            | 3             | 20.815           | 3            | pyrH        |                           |
| Q57003    | PIV protein OS=Pseudomonas aeruginosa GN=piv PE=4 SV=1 - [Q57003_PSEAE]                                                                                                                      | 18.38            | 3             | 18.38            | 3             | 18.38            | 3            | piv         |                           |
| Q9HW6C    | 50S ribosomal protein L1 OS=Pseudomonas aeruginosa (strain ATCC 15692 / PAO1 / 1C / PRS 101 / LMG 12228) GN=rplA PE=3 SV=1 - [RL1_PSEAE]                                                     | 18.18            | 3             | 18.18            | 3             | 18.18            | 3            | rplA        |                           |
| Q9HW29    | Uncharacterized protein OS=Pseudomonas aeruginosa (strain ATCC 15692 / PAO1 / 1C / PRS 101 / LMG 12228) GN=PA4373 PE=4 SV=1 - [Q9HW29_PSEAE]                                                 | 10.99            | 3             | 12.91            | 3             | 11.95            | 3            | PA4373      |                           |
| Q9I5W0    | DNA primase OS=Pseudomonas aeruginosa (strain ATCC 15692 / PAO1 / 1C / PRS 101 / LMG 12228) GN=dnaG PE=3 SV=1 - [DNAG_PSEAE]                                                                 | 8.43             | 3             | 9.04             | 3             | 8.735            | 3            | dnaG        |                           |
| Q9I783    | Uncharacterized protein PA0049 OS=Pseudomonas aeruginosa (strain ATCC 15692 / PAO1 / 1C / PRS 101 / LMG 12228) GN=PA0049 PE=1 SV=1 - [Y049_PSEAE]                                            | 9.04             | 3             | 9.04             | 3             | 9.04             | 3            | PA0049      |                           |
| Q9HX92    | Probable transcriptional regulator OS=Pseudomonas aeruginosa (strain ATCC 15692 / PAO1 / 1C / PRS 101 / LMG 12228) GN=PA3921 PE=4 SV=1 - [Q9HX92_PSEAE]                                      | 7.06             | 3             | 7.17             | 3             | 7.115            | 3            | PA3921      |                           |
| Q00514    | Type II secretion system protein G OS=Pseudomonas aeruginosa (strain ATCC 15692 / PAO1 / 1C / PRS 101 / LMG 12228) GN=xcpT PE=1 SV=1 - [GSPG_PSEAE]                                          | 39.44            | 2             | 38.73            | 3             | 39.085           | 2.5          | xcpT        |                           |
| Q9I5V8    | 30S ribosomal protein S21 OS=Pseudomonas aeruginosa (strain ATCC 15692 / PAO1 / 1C / PRS 101 / LMG 12228) GN=rpsU PE=1 SV=3 - [RS21_PSEAE]                                                   | 35.21            | 2             | 35.21            | 3             | 35.21            | 2.5          | rpsU        |                           |
| Q9HT81    | Probable GTP-binding protein EngB OS=Pseudomonas aeruginosa (strain ATCC 15692 / PAO1 / 1C / PRS 101 / LMG 12228) GN=engB PE=3 SV=1 - [ENGB_PSEAE]                                           | 15.35            | 2             | 26.05            | 3             | 20.7             | 2.5          | PA5492      |                           |
| Q9HW4F    | 50S ribosomal protein L15 OS=Pseudomonas aeruginosa (strain ATCC 15692 / PAO1 / 1C / PRS 101 / LMG 12228) GN=rplO PE=3 SV=1 - [RL15_PSEAE]                                                   | 18.06            | 2             | 21.92            | 3             | 20.49            | 2.5          | rplO        |                           |
| Q9HZP6    | Electron transfer flavoprotein subunit beta OS=Pseudomonas aeruginosa (strain                                                                                                                |                  |               |                  |               |                  |              |             |                           |

| Accession | Description                                                                                                                                                                                                        | Coverage Expt. 1 | # PSM Expt. 1 | Coverage Expt. 2 | # PSM Expt. 2 | Average Coverage | Average #PSM | Gene   | Confirmed CtpA substrate? |
|-----------|--------------------------------------------------------------------------------------------------------------------------------------------------------------------------------------------------------------------|------------------|---------------|------------------|---------------|------------------|--------------|--------|---------------------------|
| Q9HXF4    | Uncharacterized protein OS=Pseudomonas aeruginosa (strain ATCC 15692 / PAO1 / 1C / PRS 101 / LMG 12228) GN=PA3852 PE=4 SV=1 - [Q9HXF4_PSEAE]                                                                       | 9.97             | 2             | 9.97             | 3             | 9.97             | 2.5          | PA3852 | YES                       |
| Q9I459    | Uncharacterized protein OS=Pseudomonas aeruginosa (strain ATCC 15692 / PAO1 / 1C / PRS 101 / LMG 12228) GN=PA1045 PE=4 SV=1 - [Q9I459_PSEAE]                                                                       | 4.20             | 2             | 6.02             | 3             | 5.11             | 2.5          | PA1045 |                           |
| Q9LCT4    | Membrane protein OS=Pseudomonas aeruginosa GN=spoIIQ PE=4 SV=1 - [Q9LCT4_PSEAE]                                                                                                                                    | 17.26            | 4             | 17.26            | 2             | 17.26            | 3            | PA4404 |                           |
| Q51390    | Glycerol kinase 2 OS=Pseudomonas aeruginosa (strain ATCC 15692 / PAO1 / 1C / PRS 101 / LMG 12228) GN=glpK2 PE=3 SV=2 - [GLPK2_PSEAE]                                                                               | 10.69            | 4             | 7.52             | 2             | 9.105            | 3            | glpK   |                           |
| Q9HV35    | S-adenosylmethionine decarboxylase proenzyme OS=Pseudomonas aeruginosa (strain ATCC 15692 / PAO1 / 1C / PRS 101 / LMG 12228) GN=speH PE=3 SV=1 - [SPEH_PSEAE]                                                      | 21.88            | 3             | 11.88            | 2             | 16.88            | 2.5          | PA4773 |                           |
| Q9I6F6    | Uncharacterized protein OS=Pseudomonas aeruginosa (strain ATCC 15692 / PAO1 / 1C / PRS 101 / LMG 12228) GN=PA0335 PE=4 SV=1 - [Q9I6F6_PSEAE]                                                                       | 21.66            | 3             | 16.13            | 2             | 18.895           | 2.5          | PA0335 |                           |
| Q9HZ65    | Methylthioribose-1-phosphate isomerase OS=Pseudomonas aeruginosa (strain ATCC 15692 / PAO1 / 1C / PRS 101 / LMG 12228) GN=mtnA PE=3 SV=1 - [MTNA_PSEAE]                                                            | 17.60            | 3             | 14.80            | 2             | 16.2             | 2.5          | PA3169 |                           |
| Q51508    | Salicylate biosynthesis isochorismate synthase OS=Pseudomonas aeruginosa (strain ATCC 15692 / PAO1 / 1C / PRS 101 / LMG 12228) GN=pchA PE=1 SV=1 - [PCHA_PSEAE]                                                    | 9.87             | 3             | 6.30             | 2             | 8.085            | 2.5          | pchA   |                           |
| P42805    | 4-diphosphocytidyl-2-C-methyl-D-erythritol kinase OS=Pseudomonas aeruginosa (strain ATCC 15692 / PAO1 / 1C / PRS 101 / LMG 12228) GN=ispE PE=3 SV=2 - [ISPE_PSEAE]                                                 | 12.41            | 3             | 6.38             | 2             | 9.395            | 2.5          | ipk    |                           |
| Q51426    | Holliday junction ATP-dependent DNA helicase RuvB OS=Pseudomonas aeruginosa (strain ATCC 15692 / PAO1 / 1C / PRS 101 / LMG 12228) GN=ruvB PE=3 SV=2 - [RUVB_PSEAE]                                                 | 8.81             | 3             | 6.53             | 2             | 7.67             | 2.5          | ruvB   |                           |
| Q9I000    | Probable aldolase OS=Pseudomonas aeruginosa (strain ATCC 15692 / PAO1 / 1C / PRS 101 / LMG 12228) GN=PA2843 PE=4 SV=1 - [Q9I000_PSEAE]                                                                             | 8.04             | 3             | 6.70             | 2             | 7.37             | 2.5          | PA2843 |                           |
| Q9HXE7    | Carboxylesterase OS=Pseudomonas aeruginosa (strain ATCC 15692 / PAO1 / 1C / PRS 101 / LMG 12228) GN=PA3859 PE=1 SV=1 - [Q9HXE7_PSEAE]                                                                              | 22.33            | 2             | 21.40            | 2             | 21.865           | 2            | PA3859 |                           |
| P34003    | Shikimate kinase OS=Pseudomonas aeruginosa (strain ATCC 15692 / PAO1 / 1C / PRS 101 / LMG 12228) GN=aroK PE=3 SV=2 - [AROK_PSEAE]                                                                                  | 17.44            | 2             | 17.44            | 2             | 17.44            | 2            | aroK   |                           |
| Q9I022    | Probable glutathione S-transferase OS=Pseudomonas aeruginosa (strain ATCC 15692 / PAO1 / 1C / PRS 101 / LMG 12228) GN=PA2821 PE=3 SV=1 - [Q9I022_PSEAE]                                                            | 14.55            | 2             | 14.55            | 2             | 14.55            | 2            | PA2821 |                           |
| Q9I0L1    | High frequency lysogenization protein HflD homolog OS=Pseudomonas aeruginosa (strain ATCC 15692 / PAO1 / 1C / PRS 101 / LMG 12228) GN=hflD PE=3 SV=1 - [HFLD_PSEAE]                                                | 14.08            | 2             | 14.08            | 2             | 14.08            | 2            | PA2627 |                           |
| Q9HU43    | 1-(5-phosphoribosyl)-5-[(5-phosphoribosylamino)methylideneamino]imidazole-4-carboxamide isomerase OS=Pseudomonas aeruginosa (strain ATCC 15692 / PAO1 / 1C / PRS 101 / LMG 12228) GN=hisA PE=3 SV=1 - [HIS4_PSEAE] | 11.02            | 2             | 11.02            | 2             | 11.02            | 2            | hisA   |                           |
| Q9HU12    | Probable hydrolase OS=Pseudomonas aeruginosa (strain ATCC 15692 / PAO1 / 1C / PRS 101 / LMG 12228) GN=PA5177 PE=4 SV=1 - [Q9HU12_PSEAE]                                                                            | 10.41            | 2             | 10.41            | 2             | 10.41            | 2            | PA5177 |                           |
| Q9I0T9    | Exodeoxyribonuclease III OS=Pseudomonas aeruginosa (strain ATCC 15692 / PAO1 / 1C / PRS 101 / LMG 12228) GN=xthA PE=4 SV=1 - [Q9I0T9_PSEAE]                                                                        | 10.37            | 2             | 7.04             | 2             | 8.705            | 2            | xthA   |                           |
| Q9HVD6    | Uncharacterized protein OS=Pseudomonas aeruginosa (strain ATCC 15692 / PAO1 / 1C / PRS 101 / LMG 12228) GN=PA4656 PE=4 SV=1 - [Q9HVD6_PSEAE]                                                                       | 10.16            | 2             | 10.16            | 2             | 10.16            | 2            | PA4656 |                           |
| Q9HXG6    | Probable ATP-binding component of ABC transporter OS=Pseudomonas aeruginosa (strain ATCC 15692 / PAO1 / 1C / PRS 101 / LMG 12228) GN=PA3838 PE=3 SV=1 - [Q9HXG6_PSEAE]                                             | 9.85             | 2             | 9.85             | 2             | 9.85             | 2            | PA3838 |                           |
| Q9I4P4    | Peptidoglycan hydrolase FlgJ OS=Pseudomonas aeruginosa (strain ATCC 15692 / PAO1 / 1C / PRS 101 / LMG 12228) GN=flgJ PE=3 SV=1 - [FLGJ_PSEAE]                                                                      | 6.50             | 2             | 6.50             | 2             | 6.5              | 2            | flgJ   |                           |
